# Supplementary material
Source: publisher figshare collection journal article supplement (https://karger.figshare.com/ndownloader/files/13786388)
Supplement: Supplementary file 1 [file 13786388]

## **Supplementary Material**

# **Resveratrol Ameliorates Lipid Droplet Accumulation in Liver Through a SIRT1/ATF6-Dependent Mechanism**

Rui Zhou<sup>a</sup> Long Yi<sup>a</sup> Xikun Ye<sup>a</sup> Xianglong Zeng<sup>a</sup> Kai Liu<sup>a,b</sup> Yu Qin<sup>a</sup>  
Qianyong Zhang<sup>a</sup> Mantian Mi<sup>a</sup>

<sup>a</sup>Research Center for Nutrition and Food Safety, Institute of Military Preventive Medicine, Third Military Medical University, Chongqing Key Laboratory of Nutrition and Food Safety, Chongqing, <sup>b</sup> Department of Health Supervision, Center for Disease Control and Prevention of Shenyang Joint Logistic Support Center, Shenyang, China

## Supporting Figures

Figure S1

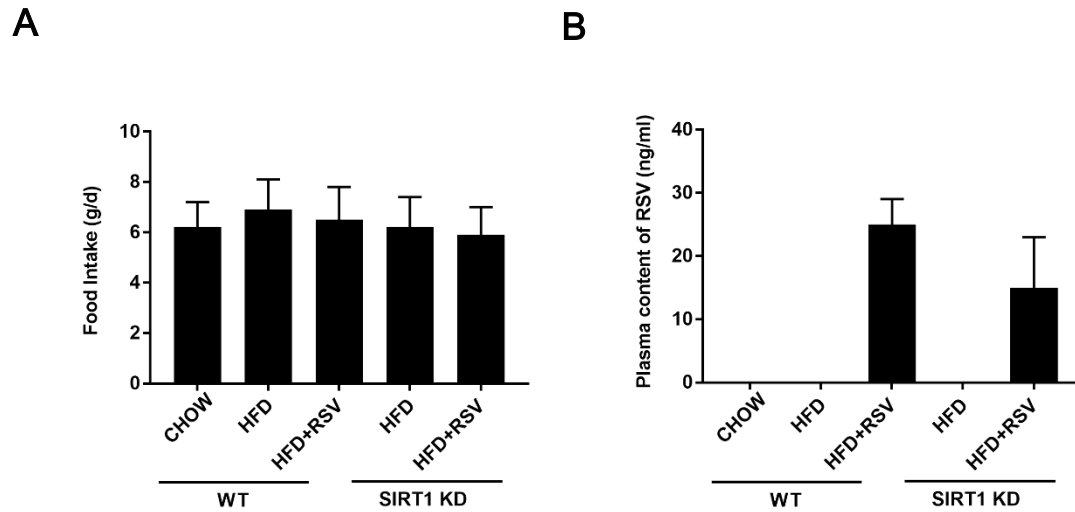

**Figure S1 Food intake and plasma content of RSV in mice.** Mice were first fed with either HFD (containing 60% fat) or chow diet for 2 weeks. Thereafter, HFD-fed mice were administrated with or without RSV of 400 mg/kg/day intragastrically accompanied by the presence or absence of the shSIRT1 plasmids injection through nail vein every five days. A: Food intake from group-housed animals was assessed daily. Animal runs were cleaned and a known amount of food was added to the run twice daily. Before food replenishment, uneaten chow pellets were carefully collected and weighed. And food intake was determined based on amount eaten and the number of animals per run. B: RSV plasma concentrations were measured by liquid chromatography-mass spectrometry. Values are presented as mean  $\pm$  SD (n = 3).

Figure S2

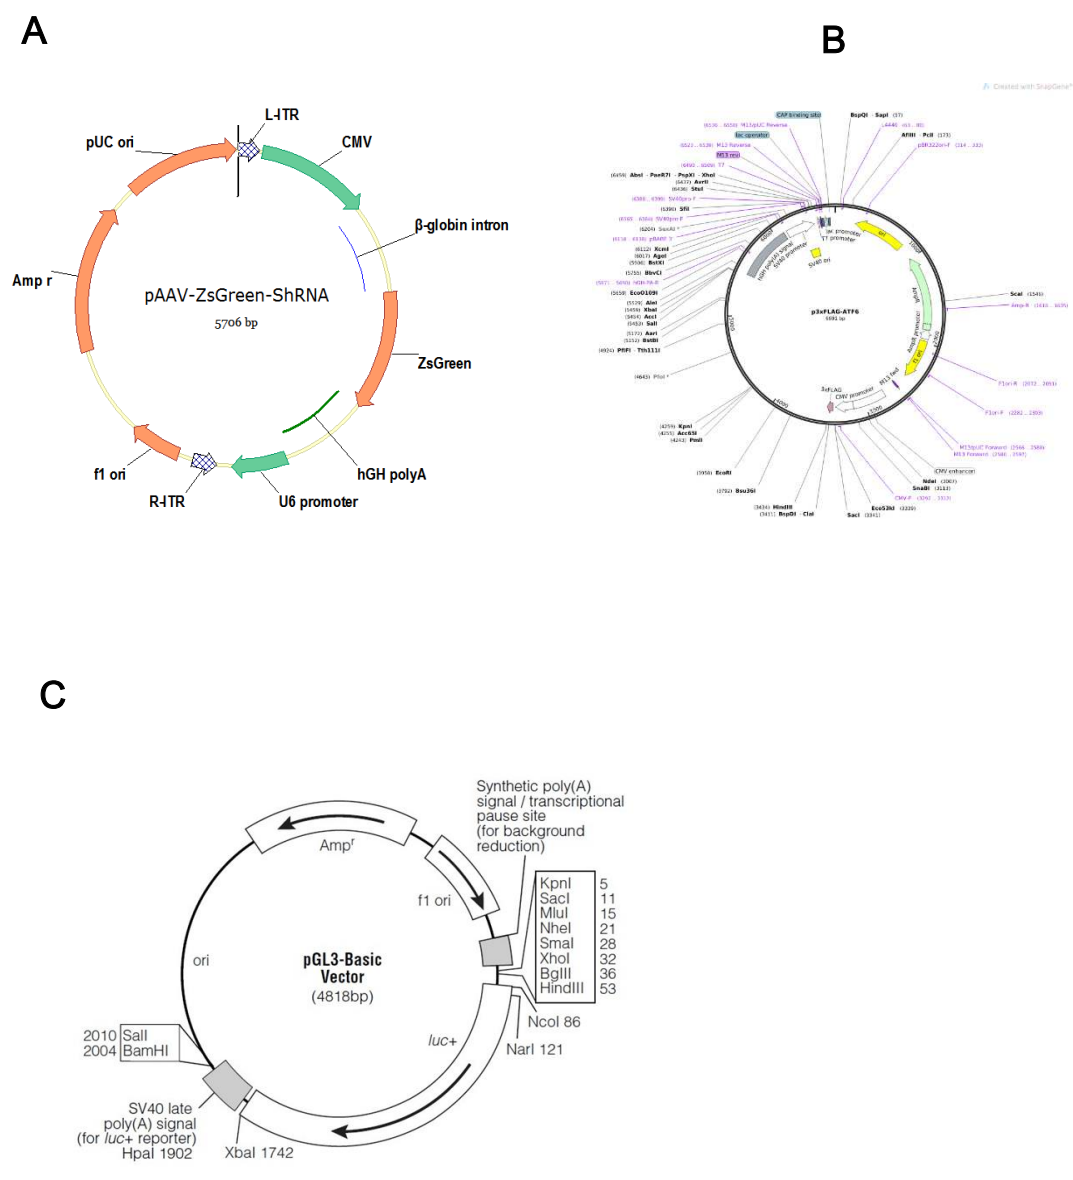

**Figure S2 Schematic map of plasmids used in the study.** A: pAAV-ZsGreen-shRNA-mSIRT1 plasmid. B: p3xFLAG-ATF6 plasmid. C: pGL3-basic-SIRT1 plasmid.
